# Supplementary material
Source: publisher site journal article supplement (https://www.dovepress.com/article/598237)
Supplement: Supplementary file 1 [file 598237%20Supplementary%20Tables.docx]

**Supplementary Table S1. Summary of Global Brant Test Results (Omnibus *P* values) Across Cataract Subtypes and Multivariate Models**

| Cataract Subtype | Model 1 (Omnibus *P* value) | Model 2 (Omnibus *P* value) | Model 3 (Omnibus *P* value) |
| --- | --- | --- | --- |
| Posterior Subcapsular (PSC) | 0.33 | 0.09 | 0.32 |
| Cortical (C) | 0.17 | 0.17 | 0.17 |
| Nuclear (N) | 0.96 | 0.48 | 0.86 |

The table displays the global Omnibus *P* values from the Brant test, which evaluates the proportional odds assumption for each multivariate model configuration. A *P* value ≥ 0.05 indicates that the model does not significantly violate the proportional odds assumption, thereby establishing the mathematical validity of the ordinal logistic regression approach across all analyzed cataract morphological subtypes.

**Supplementary Table S2. Variance Inflation Factors (VIF) for Collinearity Assessment of Individual Covariates**

| Variable | VIFa |
| --- | --- |
| APO-A | 2.922 |
| APO-B | 11.968 |
| APO-E | 1.468 |
| AL | 1.136 |
| BUN | 1.265 |
| CR | 2.083 |
| D-BIL | 3.471 |
| GLU | 1.155 |
| GR | 1.609 |
| HBA1c | 1.172 |
| HDL-C | 4.580 |
| LDH | 1.622 |
| LP(a) | 1.226 |
| LDL-C | 12.179 |
| Sex (Female) | 2.019 |
| sdLDL | 3.827 |
| SOD | 1.173 |
| TBA | 1.136 |
| T-BIL | 3.095 |
| TC | 7.104 |
| TG | 2.220 |
| UA | 1.757 |

aVIF >5 indicate high multicollinearity. To prevent inherent structural collinearity, composite metabolic indices (e.g., TyG, AIP, nonHDL-C) were a priori excluded from this assessment. Among the remaining individual covariates, variables demonstrating VIF>5 (TC, LDL-C, APO-B) were carefully evaluated, and representative core lipid parameters (e.g., APO-B) were prioritized in the final multivariate models to maintain model stability.

**Supplementary Table S3. Baseline Characteristics of the ARC patients by the severity of PSC**

| Variable | Overall,  n=384a | P=1,  n=26 (6.8%)a | P=2,  n=171 (45%)a | P=3,  n=155 (40%)a | P=4,  n=32 (8.3%)a | *P* valueb,c |
| --- | --- | --- | --- | --- | --- | --- |
| Sex |  |  |  |  |  | 0.612 |
| Male | 125 (32.6%) | 10 (38.5%) | 60 (35.1%) | 45 (29.0%) | 10 (31.2%) |  |
| Female | 259 (67.4%) | 16 (61.5%) | 111 (64.9%) | 110 (71.0%) | 22 (68.8%) |  |
| Age,yr | 68.65 ± 8.42 | 64.52 ± 8.59 | 69.25 ± 7.46 | 68.84 ± 8.61 | 67.94 ± 11.28 | 0.077 |
| AL,mm | 23.41 (22.85, 24.07) | 23.46 (22.55, 24.08) | 23.48 (22.84, 24.09) | 23.36 (22.89, 24.05) | 23.34 (22.83, 23.93) | 0.877 |
| HBA1C,% | 5.70 (5.50, 6.00) | 5.70 (5.43, 5.97) | 5.70 (5.50, 6.00) | 5.70 (5.50, 5.90) | 5.70 (5.50, 6.00) | 0.916 |
| BUN,mmol/L | 5.70 (4.80, 6.50) | 5.90 (4.65, 6.80) | 5.70 (4.95, 6.50) | 5.60 (4.70, 6.40) | 5.59 (4.68, 6.43) | 0.67 |
| CR,μmol/L | 68.00 (59.00, 79.12) | 64.00 (56.75, 80.25) | 68.00 (59.50, 79.00) | 67.00 (57.50, 77.00) | 71.00 (64.75, 81.25) | 0.275 |
| UA,μmol/L | 303.00 (259.50, 356.75) | 313.00 (250.00, 344.50) | 302.00 (250.50, 360.00) | 300.00 (260.00, 350.50) | 307.50 (269.25, 401.50) | 0.847 |
| T-BIL,μmol/L | 10.00 (8.00, 13.00) | 10.00 (7.25, 11.15) | 10.00 (8.00, 13.00) | 10.00 (8.05, 13.00) | 9.05 (7.00, 14.33) | 0.731 |
| D-BIL,μmol/L | 4.00 (3.00, 5.00) | 3.95 (3.00, 4.15) | 4.00 (3.00, 5.00) | 4.00 (3.00, 5.00) | 4.00 (3.00, 5.23) | 0.751 |
| TBA,μmol/L | 4.50 (2.90, 7.03) | 3.75 (3.00, 5.70) | 4.60 (2.85, 7.60) | 4.40 (3.15, 6.80) | 4.55 (2.82, 7.23) | 0.853 |
| GLU,mmol/L | 5.60 (5.20, 6.03) | 5.45 (5.11, 5.88) | 5.60 (5.15, 6.10) | 5.50 (5.20, 5.90) | 6.00 (5.38, 6.78) | 0.068 |
| TC,mmol/L | 5.17 (4.57, 5.85) | 5.30 (5.10, 5.93) | 4.97 (4.46, 5.79) | 5.26 (4.60, 6.01) | 5.26 (4.33, 5.93) | 0.061 |
| TG,mmol/L | 1.51 (1.05, 2.10) | 1.14 (0.83, 1.67) | 1.52 (1.04, 2.04) | 1.52 (1.06, 2.12) | 1.73 (1.34, 2.19) | 0.034(*) |
| HDL-C,mmol/L | 1.49 (1.26, 1.76) | 1.54 (1.36, 1.86) | 1.52 (1.28, 1.72) | 1.48 (1.25, 1.79) | 1.43 (1.18, 1.64) | 0.48 |
| LDL-C,mmol/L | 3.10 ± 0.84 | 3.23 ± 0.66 | 2.97 ± 0.88 | 3.19 ± 0.80 | 3.30 ± 0.81 | 0.038(*) |
| APO-A,g/L | 1.62 ± 0.26 | 1.54 ± 0.27 | 1.64 ± 0.25 | 1.63 ± 0.27 | 1.54 ± 0.28 | 0.098 |
| APO-B,g/L | 1.02 ± 0.25 | 1.01 ± 0.19 | 0.97 ± 0.26 | 1.05 ± 0.24 | 1.10 ± 0.24 | 0.007(**) |
| APO-E,mg/L | 44.00 (38.00, 50.25) | 40.50 (34.00, 43.00) | 44.00 (38.00, 50.00) | 44.00 (39.00, 51.00) | 46.50 (39.75, 51.62) | 0.047(*) |
| LP(a),mg/L | 70.00 (33.00, 146.50) | 79.00 (37.12, 100.00) | 70.00 (32.00, 155.00) | 74.00 (33.50, 143.25) | 59.25 (42.75, 167.50) | 0.946 |
| sdLDL,mmol/L | 0.97 (0.64, 1.32) | 0.97 (0.71, 1.19) | 0.92 (0.57, 1.29) | 0.97 (0.67, 1.31) | 1.28 (0.82, 1.45) | 0.057 |
| LDH,U/L | 172.00 (152.00, 189.00) | 158.50 (141.50, 176.75) | 169.00 (151.50, 185.50) | 175.00 (154.00, 190.00) | 179.50 (152.25, 201.75) | 0.135 |
| GR,U/L | 54.09 ± 7.69 | 51.50 ± 6.04 | 54.26 ± 8.08 | 54.35 ± 7.35 | 54.02 ± 8.34 | 0.361 |
| SOD,U/mL | 192.28 ± 18.59 | 200.35 ± 19.08 | 192.79 ± 18.52 | 189.93 ± 18.60 | 194.42 ± 16.96 | 0.047(*) |
| TyG | 1.47 ± 0.55 | 1.26 ± 0.55 | 1.47 ± 0.56 | 1.47 ± 0.53 | 1.71 ± 0.54 | 0.022(*) |
| AIP | -0.00 ± 0.26 | -0.12 ± 0.27 | -0.01 ± 0.27 | -0.00 ± 0.26 | 0.11 ± 0.23 | 0.010(*) |
| nonHDL-C,mmol/L | 3.64 ± 0.87 | 3.83 ± 0.82 | 3.47 ± 0.91 | 3.74 ± 0.83 | 3.90 ± 0.73 | 0.006(**) |
| UHR | 0.20 (0.15, 0.27) | 0.19 (0.14, 0.26) | 0.20 (0.15, 0.27) | 0.20 (0.15, 0.28) | 0.22 (0.17, 0.30) | 0.367 |
| eGFR | 0.61 ± 0.12 | 0.66 ± 0.13 | 0.61 ± 0.12 | 0.61 ± 0.12 | 0.57 ± 0.13 | 0.036(*) |
| an (%); Mean±SD; Median (IQR) | | | | | | |
| bPearson's Chi-squared test; Kruskal-Wallis rank sum test; One-way ANOVA | | | | | | |
| c*P*<0.05(*)，*P*<0.01(**) | | | | | | |

**Supplementary Table S4. Baseline Characteristics of the ARC patients by the severity of Cortical cataract**

| Variable | Overall,  n=384a | C=1,  n=149(38.8%)a | C=2,  n=114(29.7%)a | C=3,  n=121(31.5%)a | *P* valueb,c |
| --- | --- | --- | --- | --- | --- |
| Sex |  |  |  |  | 0.010(*) |
| Male | 125 (32.6%) | 62 (41.6%) | 29 (25.4%) | 34 (28.1%) |  |
| Female | 259 (67.4%) | 87 (58.4%) | 85 (74.6%) | 87 (71.9%) |  |
| Age,yr | 68.65 ± 8.42 | 67.74 ± 8.65 | 70.61 ± 8.40 | 67.93 ± 7.91 | 0.012(*) |
| AL,mm | 23.41 (22.85, 24.07) | 23.45 (22.85, 24.23) | 23.41 (22.86, 24.00) | 23.38 (22.85, 23.93) | 0.476 |
| HBA1C,% | 5.70 (5.50, 6.00) | 5.70 (5.40, 5.90) | 5.70 (5.56, 6.00) | 5.70 (5.50, 5.90) | 0.117 |
| BUN,mmol/L | 5.70 (4.80, 6.50) | 5.70 (4.70, 6.40) | 5.90 (4.95, 6.60) | 5.60 (4.70, 6.40) | 0.272 |
| CR,μmol/L | 68.00 (59.00, 79.12) | 69.00 (59.00, 80.00) | 68.00 (59.00, 79.12) | 67.00 (58.00, 78.00) | 0.579 |
| UA,μmol/L | 303.00 (259.50, 356.75) | 297.00 (254.00, 360.00) | 297.00 (253.50, 339.00) | 322.00 (260.00, 360.00) | 0.104 |
| T-BIL,μmol/L | 10.00 (8.00, 13.00) | 9.90 (8.00, 13.00) | 9.65 (8.00, 13.00) | 11.00 (8.80, 13.00) | 0.137 |
| D-BIL,μmol/L | 4.00 (3.00, 5.00) | 4.00 (3.00, 5.00) | 4.00 (3.00, 5.00) | 4.00 (3.00, 5.00) | 0.815 |
| TBA,μmol/L | 4.50 (2.90, 7.03) | 4.40 (2.90, 7.60) | 4.65 (2.94, 6.75) | 4.50 (2.90, 6.50) | 0.737 |
| GLU,mmol/L | 5.60 (5.20, 6.03) | 5.50 (5.10, 6.00) | 5.55 (5.23, 6.00) | 5.70 (5.30, 6.15) | 0.179 |
| TC,mmol/L | 5.17 (4.57, 5.85) | 5.11 (4.37, 5.79) | 5.21 (4.64, 5.87) | 5.24 (4.50, 6.05) | 0.421 |
| TG,mmol/L | 1.51 (1.05, 2.10) | 1.43 (1.03, 1.92) | 1.40 (0.99, 2.13) | 1.71 (1.13, 2.15) | 0.098 |
| HDL-C,mmol/L | 1.49 (1.26, 1.76) | 1.49 (1.27, 1.79) | 1.53 (1.33, 1.80) | 1.46 (1.21, 1.72) | 0.4 |
| LDL-C,mmol/L | 3.10 ± 0.84 | 3.03 ± 0.85 | 3.12 ± 0.77 | 3.18 ± 0.87 | 0.287 |
| APO-A,g/L | 1.62 ± 0.26 | 1.59 ± 0.25 | 1.66 ± 0.27 | 1.62 ± 0.27 | 0.118 |
| APO-B,g/L | 1.02 ± 0.25 | 0.99 ± 0.25 | 1.02 ± 0.23 | 1.05 ± 0.26 | 0.111 |
| APO-E,mg/L | 44.00 (38.00, 50.25) | 42.00 (36.00, 51.00) | 44.00 (39.00, 49.00) | 46.00 (39.00, 51.00) | 0.385 |
| LP(a),mg/L | 70.00 (33.00, 146.50) | 70.50 (35.00, 148.50) | 61.00 (32.00, 136.00) | 70.00 (35.00, 154.00) | 0.725 |
| sdLDL,mmol/L | 0.97 (0.64, 1.32) | 0.98 (0.61, 1.27) | 0.90 (0.57, 1.32) | 1.01 (0.77, 1.37) | 0.129 |
| LDH,U/L | 172.00 (152.00, 189.00) | 164.00 (147.00, 185.00) | 178.00 (165.00, 190.75) | 173.00 (154.00, 192.00) | 0.002(**) |
| GR,U/L | 54.09 ± 7.69 | 53.08 ± 8.41 | 54.56 ± 6.75 | 54.90 ± 7.53 | 0.114 |
| SOD,U/mL | 192.28 ± 18.59 | 193.71 ± 18.61 | 190.36 ± 19.61 | 192.33 ± 17.54 | 0.351 |
| TyG | 1.47 ± 0.55 | 1.42 ± 0.53 | 1.44 ± 0.57 | 1.58 ± 0.55 | 0.045(*) |
| AIP | -0.00 ± 0.26 | -0.03 ± 0.27 | -0.03 ± 0.26 | 0.04 ± 0.26 | 0.057 |
| nonHDL-C,mmol/L | 3.64 ± 0.87 | 3.54 ± 0.89 | 3.64 ± 0.83 | 3.76 ± 0.87 | 0.128 |
| UHR | 0.20 (0.15, 0.27) | 0.20 (0.14, 0.27) | 0.19 (0.15, 0.24) | 0.22 (0.16, 0.30) | 0.087 |
| eGFR | 0.61 ± 0.12 | 0.63 ± 0.12 | 0.58 ± 0.12 | 0.62 ± 0.13 | 0.007(**) |

| an (%); Mean±SD; Median (IQR) |
| --- |
| bPearson's Chi-squared test; Kruskal-Wallis rank sum test; One-way ANOVA |
| c*P*<0.05(*)，*P*<0.01(**) |

**Supplementary Table S5. Baseline Characteristics of the ARC patients by the severity of Nuclear cataract**

| Variable | Overall，  n=384a | N=1,  n=182(47.4%)a | N=2,  n=136(35.4%)a | N=3,  n=66(17.2%)a | *P* valueb,c |
| --- | --- | --- | --- | --- | --- |
| Sex |  |  |  |  | 0.012(*) |
| Male | 125 (32.6%) | 46 (25.3%) | 51 (37.5%) | 28 (42.4%) |  |
| Female | 259 (67.4%) | 136 (74.7%) | 85 (62.5%) | 38 (57.6%) |  |
| Age,yr | 68.65 ± 8.42 | 67.02 ± 7.76 | 69.51 ± 8.51 | 71.37 ± 9.15 | <0.001(***) |
| AL,mm | 23.41 (22.85, 24.07) | 23.33 (22.81, 23.96) | 23.48 (22.84, 24.09) | 23.54 (23.16, 24.75) | 0.015(*) |
| HBA1C,% | 5.70 (5.50, 6.00) | 5.80 (5.50, 6.00) | 5.70 (5.50, 5.90) | 5.70 (5.43, 5.90) | 0.189 |
| BUN,mmol/L | 5.70 (4.80, 6.50) | 5.60 (4.80, 6.57) | 5.80 (4.80, 6.43) | 5.75 (4.60, 6.40) | 0.961 |
| CR,μmol/L | 68.00 (59.00, 79.12) | 66.00 (57.00, 75.00) | 69.50 (61.00, 80.00) | 70.00 (61.00, 82.00) | 0.017(*) |
| UA,μmol/L | 303.00 (259.50, 356.75) | 308.50 (260.00, 350.00) | 304.50 (258.00, 360.00) | 293.50 (260.00, 360.00) | 0.995 |
| T-BIL,μmol/L | 10.00 (8.00, 13.00) | 10.00 (8.00, 13.00) | 10.00 (8.00, 12.93) | 10.00 (8.10, 14.00) | 0.503 |
| D-BIL,μmol/L | 4.00 (3.00, 5.00) | 4.00 (3.00, 5.00) | 4.00 (3.00, 5.00) | 4.00 (3.92, 5.15) | 0.035(*) |
| TBA,μmol/L | 4.50 (2.90, 7.03) | 4.53 (3.00, 7.00) | 4.05 (2.40, 7.05) | 5.10 (3.37, 8.40) | 0.062 |
| GLU,mmol/L | 5.60 (5.20, 6.03) | 5.60 (5.20, 6.10) | 5.50 (5.20, 5.96) | 5.70 (5.23, 6.19) | 0.354 |
| TC,mmol/L | 5.17 (4.57, 5.85) | 5.27 (4.66, 6.12) | 5.16 (4.45, 5.79) | 5.00 (4.52, 5.75) | 0.053 |
| TG,mmol/L | 1.51 (1.05, 2.10) | 1.52 (1.08, 2.14) | 1.42 (1.02, 1.92) | 1.65 (1.11, 2.16) | 0.284 |
| HDL-C,mmol/L | 1.49 (1.26, 1.76) | 1.53 (1.28, 1.76) | 1.48 (1.26, 1.75) | 1.46 (1.19, 1.77) | 0.605 |
| LDL-C,mmol/L | 3.10 ± 0.84 | 3.20 ± 0.87 | 3.08 ± 0.79 | 2.91 ± 0.80 | 0.053 |
| APO-A,g/L | 1.62 ± 0.26 | 1.64 ± 0.26 | 1.61 ± 0.26 | 1.58 ± 0.27 | 0.183 |
| APO-B,g/L | 1.02 ± 0.25 | 1.04 ± 0.26 | 1.01 ± 0.24 | 0.95 ± 0.25 | 0.029(*) |
| APO-E,mg/L | 44.00 (38.00, 50.25) | 44.00 (39.00, 51.00) | 43.00 (36.75, 49.00) | 45.50 (36.00, 51.75) | 0.443 |
| LP(a),mg/L | 70.00 (33.00, 146.50) | 69.50 (32.00, 154.00) | 79.50 (34.50, 139.38) | 58.00 (37.62, 143.75) | 0.803 |
| sdLDL,mmol/L | 0.97 (0.64, 1.32) | 1.06 (0.69, 1.36) | 0.95 (0.62, 1.27) | 0.92 (0.58, 1.31) | 0.187 |
| LDH,U/L | 172.00 (152.00, 189.00) | 173.00 (154.00, 190.00) | 170.75 (152.50, 187.25) | 174.00 (150.00, 189.50) | 0.879 |
| GR,U/L | 54.09 ± 7.69 | 54.60 ± 6.85 | 53.76 ± 8.55 | 53.38 ± 8.04 | 0.447 |
| SOD,U/mL | 192.28 ± 18.59 | 193.45 ± 19.31 | 191.97 ± 15.96 | 189.73 ± 21.41 | 0.441 |
| TyG | 1.47 ± 0.55 | 1.50 ± 0.56 | 1.41 ± 0.53 | 1.53 ± 0.57 | 0.183 |
| AIP | -0.00 ± 0.26 | -0.00 ± 0.26 | -0.02 ± 0.27 | 0.02 ± 0.26 | 0.534 |
| nonHDL-C,mmol/L | 3.64 ± 0.87 | 3.76 ± 0.88 | 3.55 ± 0.80 | 3.48 ± 0.94 | 0.024(*) |
| UHR | 0.20 (0.15, 0.27) | 0.20 (0.16, 0.27) | 0.20 (0.15, 0.27) | 0.20 (0.16, 0.29) | 0.807 |
| eGFR | 0.61 ± 0.12 | 0.62 ± 0.11 | 0.60 ± 0.13 | 0.60 ± 0.13 | 0.221 |

| an (%); Mean±SD; Median (IQR) |
| --- |
| bPearson's Chi-squared test; Kruskal-Wallis rank sum test; One-way ANOVA |
| c *P*<0.05(*)，*P*<0.01(**), *P*<0.001(***) |
